# Supplementary material for: The fate of the organic phase beyond third phase formation
Source: Royal Society of Chemistry journal article supplement (doi:10.1039/d3nj02962j), 2023-01-01
Supplement: d3nj02962j1.pdf [file d3nj02962j1.pdf]

## The fate of organic phase beyond third phase formation

Parvathy Narayanan<sup>1,2</sup>, Satyabrata Mishra<sup>1</sup>, K.A. Venkatesan<sup>1,2</sup>

<sup>1</sup>Reprocessing Group, Indira Gandhi Centre for Atomic Research, Kalpakkam 603102, India.

<sup>2</sup>Homi Bhabha National Institute, Anushakthi Nagar, Mumbai 400094, India.

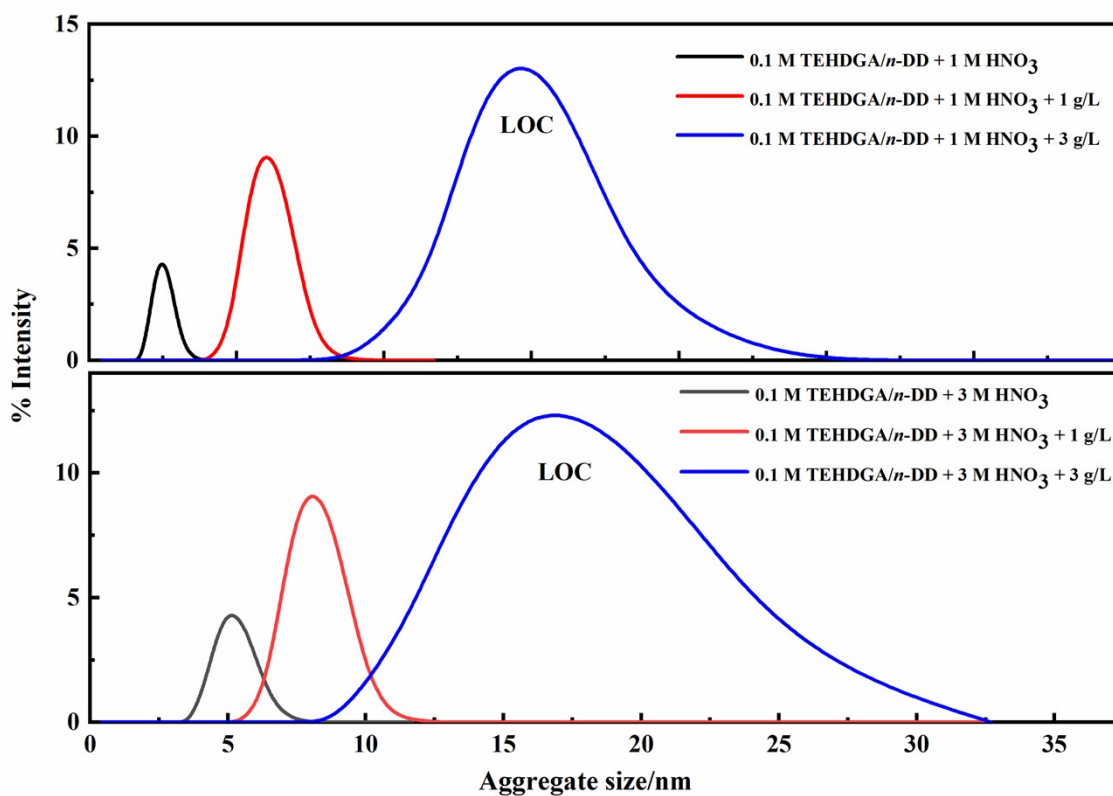

**Figure 1S.** The aggregate size distribution of the organic phase recorded after contacting the 0.1 M TEHDGA/*n*-DD with nitric acid containing Nd(III) metal ion.

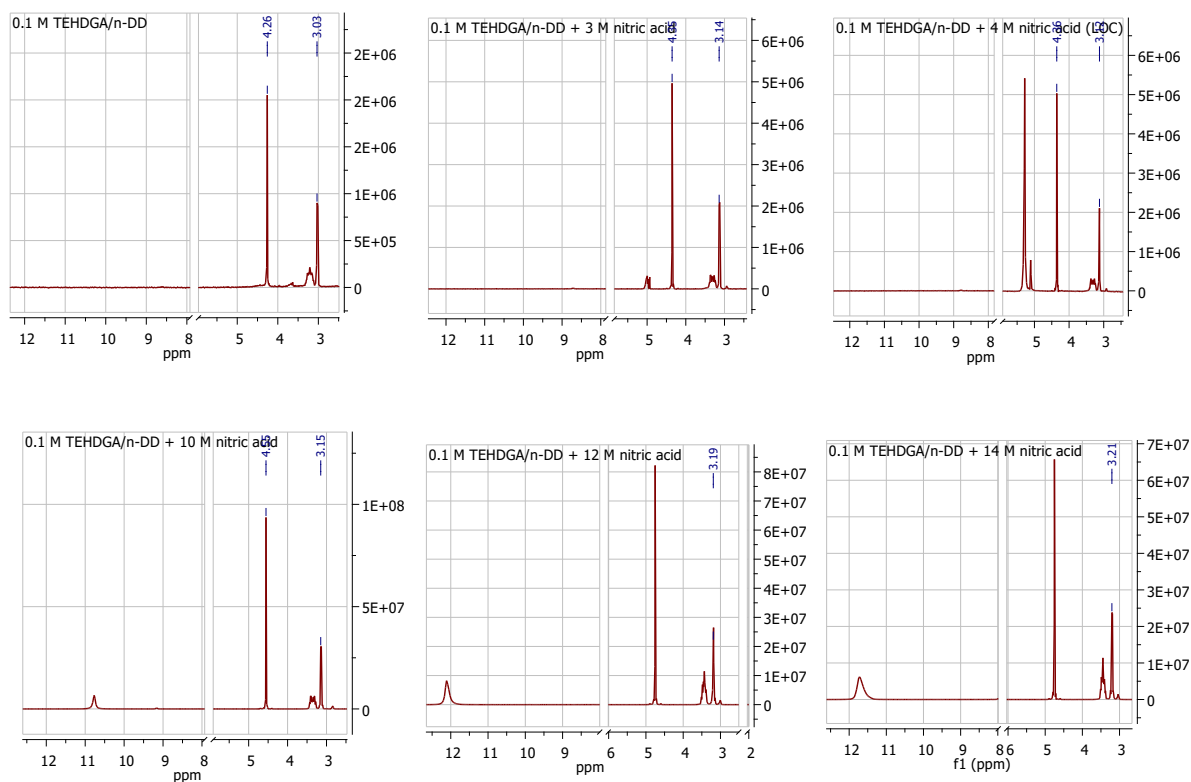

**Figure 2S**  $^1\text{H}$ NMR spectra of TEHDGA recorded before and after third phase formation. The organic phase (0.1 M TEHDGA/*n*-DD) was contacted with nitric acid of different concentrations ranging from 1 M - 14 M before recording the spectrum.

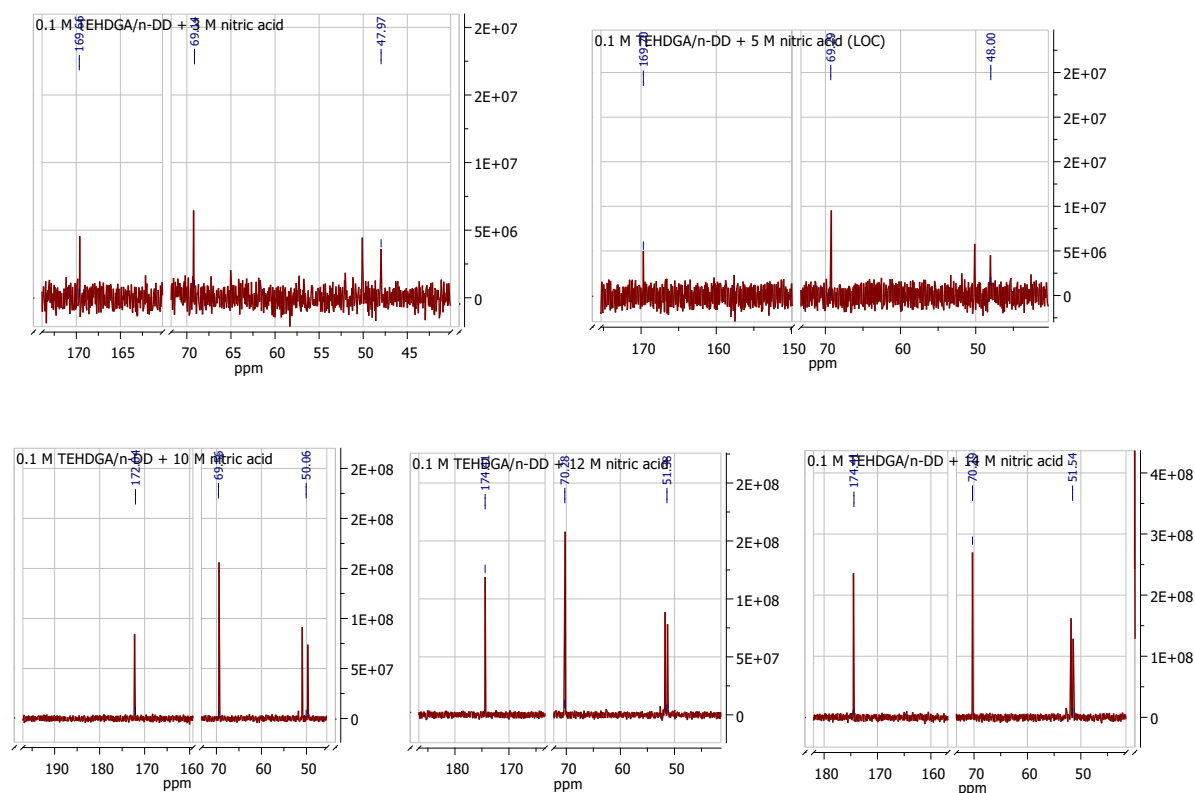

**Figure 3S**  $^{13}\text{C}$  NMR spectra of TEHDGA recorded before and after third phase formation. The organic phase (0.1 M TEHDGA/*n*-DD) was contacted with nitric acid of different concentrations ranging from 1 M - 14 M before recording the spectrum.
